# Supplementary material
Source: PubMed Central journal article supplement (PMC9259744)
Supplement: 41431_2022_1097_MOESM1_ESM.pdf [file 41431_2022_1097_MOESM1_ESM.pdf]

## Supplementary Information 1.

Figure 1. Demographic data, 87 individuals.

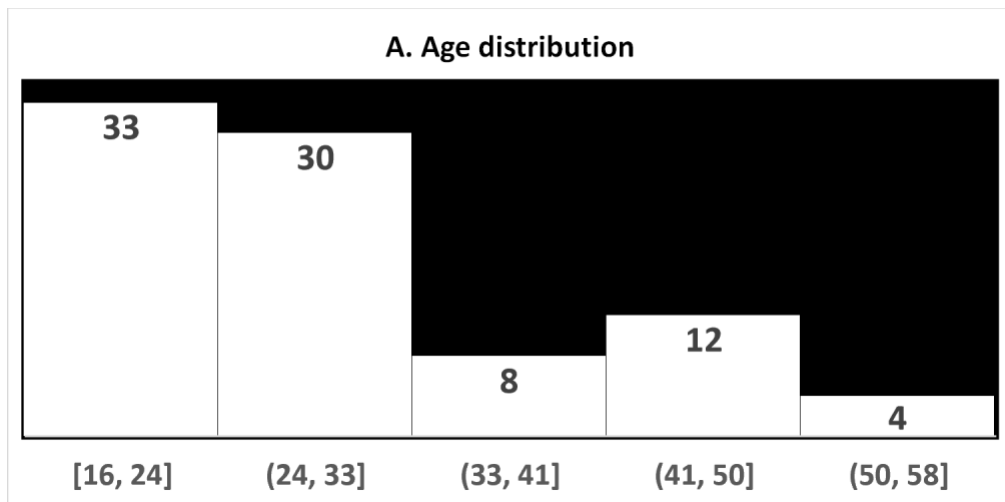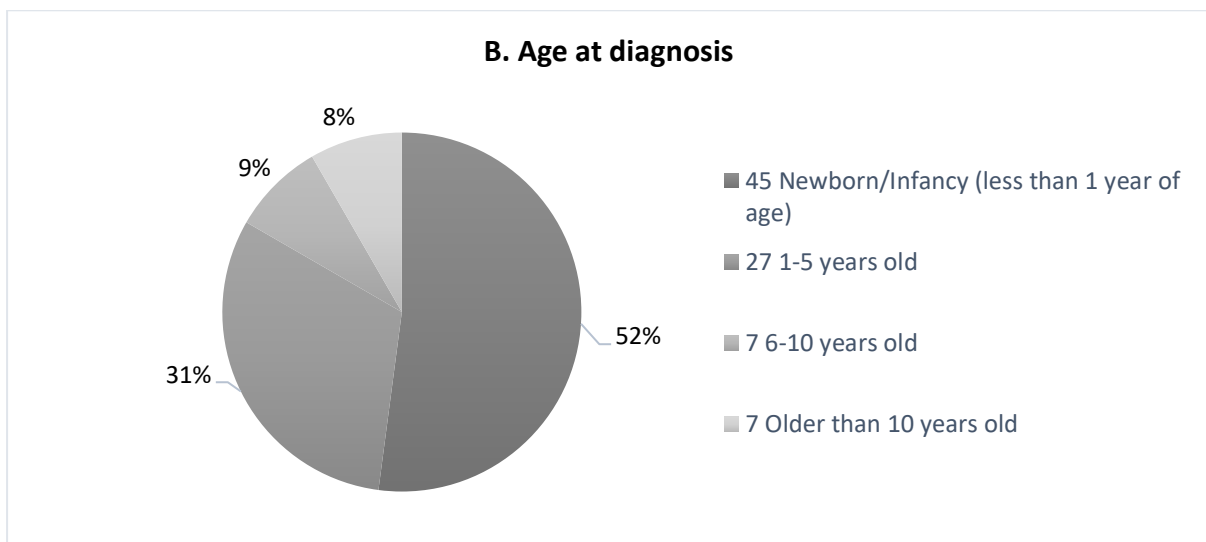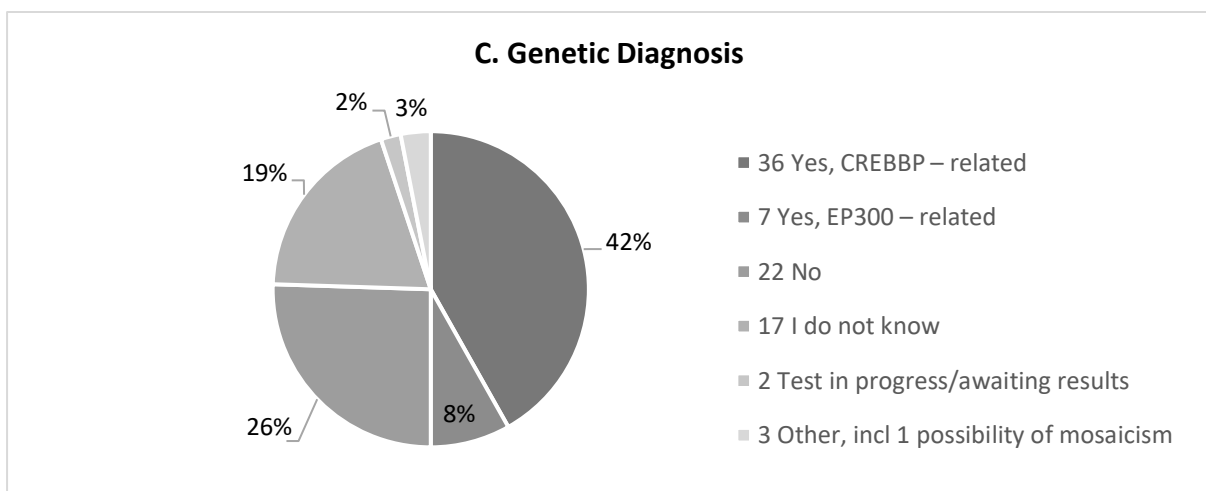

## Supplementary Tables

### Supplementary Table 1. Notable comments about the natural history of the behavioural problems

---

*“Ever since her childhood she had a hard time dealing with changes or things that went differently than she expected. It has gotten worse as she gets older.”*

*“Anxiety started in young childhood manifested by vomiting in crowds, doctor & dentist offices and has continued into adulthood. Self-harm is manifested by repetitive slaps to his face... Mood disorder started at 18, diagnosed around 20. Angry, sometimes violent outbursts towards others. Treated with medication with good results.”*

*“Aggression started at about 7. Decrease interest in things, depression, repetition started around 23.” “Aggression and anxiety started around age 26.”*

*“Most started in childhood. But the aggression towards others was after puberty.”*

*“Difficult behaviour seems to get stronger with age; fear increases.”*

*“Tension and sudden mood swings in puberty arise. Limited interest, loss of interest occurring in adulthood.”*

*“Limited interests and repetitions dates to childhood. Frustrations arose during school. ASD was diagnosed at approximately 8 years of age. Aggression especially towards me (mother) came in puberty.”*

*“Deterioration after 50th year, could be early dementia.”*

*“Sudden actions that have a goal for him but are not related to the environment or the situation, I really do not consider it a conduct disorder, rather conduct not adequate to the established standards.”*

### Supplementary Table 2. Other problems reported once or twice

---

Acne

Asthma

Bleeding when urinating

Cancer

Celiac disease

Choking

Delay to get diagnosis

Depression

Diverticulitis / Diverticulosis

Epilepsy

Gallstones

Inflammatory Bowel Disease (i.e. Crohn's, Ulcerative Colitis, etc)

Inflammatory fever syndrome

Insufficiency of sutures following surgery

Keratosis pilaris

Lipoma

Loss of job because of behavioural problems

Multiple moles

Oesophageal varices

Overweight

Pain and severe fatigue

Pancreatitis

Pericardial effusion

Pleural effusions

Severe allergies

Small Bowel Obstruction

Socially disinhibited behaviour

Stroke

The need for constant supervision

Warts on the hands
